# Supplementary material for: Fabrication of highly-stable Ag/CA@GTA hydrogel beads and their catalytic application
Source: Royal Society of Chemistry journal article supplement (doi:10.1039/c4ra08801h), 2014-11-06
Supplement: c4ra08801h1.pdf [file c4ra08801h1.pdf]

## Electronic Supplementary Materials

### Fabrication of high-stability Ag/CA@GTA hydrogel beads and their catalytic application

Shuxian Huang, Zuoyi Xiao,\* Shangru Zhai, Bin Zhai, Feng Zhang and Qingda An\*

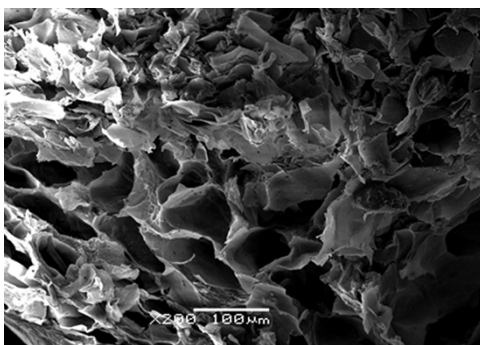

**Fig. S1** SEM images of Ag/CA@GTA hydrogel beads.

**Fig. S2** The photos of the Ag/CA hydrogel beads after 1<sup>st</sup> cycle (a), 3<sup>rd</sup> cycle (b) and 5<sup>th</sup> cycle (c), respectively.

**Fig. S3** The photos of the Ag/CA@GTA beads after 1<sup>st</sup> cycle (a), 5<sup>th</sup> cycle (b) and 10<sup>th</sup> cycle (c), respectively.
